# Supplementary material for: Age-Related Hearing Loss Associations With Changes in Brain Morphology
Source: PubMed Central journal article supplement — Trends Hear. 2019 Jun 18;23:2331216519857267. doi: 10.1177/2331216519857267 (PMC6585256; doi:10.1177/2331216519857267), 2019-06-18
Supplement: Supplemental_Material.pdf [file Supplemental_Material.pdf]

## Supplemental Materials

**LowHigh\_Hearing\_Measures.pdf.** This file provides code and instructions for how to produce the low and high frequency hearing measures used in this study.

**Supplemental Figure 1.** Low frequency hearing was not significantly associated with gray matter (GM) volume in the left Te 1.0 (top) and left Te 1.2 (bottom) at Time 1 and Time 2.

**SuppMaterial\_Vents.gif.** The attached gif shows change in the lateral ventricle for a male participant (70 years-old at Time 1) who exhibited elevated high frequency thresholds (e.g., right ear 3000 Hz: 60 dB HL at Time 1) with an expansion of the lateral ventricles over 2.5 years (shown left). This participant is compared to a male participant (84 years-old at Time 1) who exhibited lower high frequency thresholds (e.g., right ear 3000 Hz: 25 dB HL at Time 1) with less expansion of their lateral ventricles over 1.8 years (shown right). The statistical results shown in Figure 4 were performed with Jacobian images that had been adjusted for differences in time between visits. The renderings were created using the ALVIN Lateral Ventricle Segmentation toolbox ([https://www.nitrc.org/projects/alvin\\_lv/](https://www.nitrc.org/projects/alvin_lv/)) and MRICroGL <https://www.nitrc.org/projects/mricrogl/>.
